# Supplementary material for: Effects of physically active lessons and active breaks on cognitive performance and health indicators in elementary school children: A cluster randomized trial
Source: Research Square preprint supplement (doi:10.21203/rs.3.rs-5804150/v1), 2025-01-15
Supplement: Supplementary file 3 [file e9a7f167d18eeb7dc6241f0e.docx]

**Suplementary table 1.** Baseline comparisons between groups (N = 184).

|  | **CTL** | **PAL** | **AB** |  | **All** |
| --- | --- | --- | --- | --- | --- |
|  | Median (IQR) | Median (IQR) | Median (IQR) | p | Median (IQR) |
| **Cognitive test** |  |  |  |  |  |
| Go/NoGo |  |  |  |  |  |
| Correct responses | 24 (2) | 23 (2) | 24 (2) | .059 | 24 (3) |
| Time reaction | 927 (267) | 797 (296) | 876 (257) | .233 | 850 (297) |
| DigitSpan |  |  |  |  |  |
| Correct responses | 2 (1) | 2 (1) | 2 (1) | .891 | 2 (1) |
| Cueing Posner |  |  |  |  |  |
| Correct responses | 24 (2) | 24 (3) | 24 (2) | .235 | 24 (2) |
| Time reaction | 1569 (481) | 1818 (573) | 1632 (548) | .068 | 1738 (593) |
| Visual Search |  |  |  |  |  |
| Correct responses | 7 (1) | 7 (2) | 7 (2) | .514 | 7 (2) |
| Time reaction | 3801 (1530) | 3895 (1796) | 3971 (1473) | .857 | 3882 (1701) |
| Mental Rotation |  |  |  |  |  |
| Correct responses | 14 (3) a | 12 (3) ab | 12 (2) b | **.012** | 12 (3) |
| Time reaction | 5227 (2349) a | 7104 (3655) b | 6947 (2395) b | **< .001** | 6563 (3356) |
| **Movement behaviors** |  |  |  |  |  |
| Pedometer data (Steps/day) |  |  |  |  |  |
| At school | 1640 (1202) a | 1202 (875) b | 1589 (1143) a | **.003** | 1412 (1230) |
| In the week | 6633 (3031) | 5962 (2944) | 6801 (3925) | .850 | 6435 (3301) |
| Web-CAAFE |  |  |  |  |  |
| Physical activity | 3 (2) a | 3 (3) a | 5 (5) b | **< . 001** | 3 (3) |
| Screen-based activity | 1 (2) a | 2 (1) b | 2 (1) a | **< .001** | 2 (2) |
| **Health indicators** |  |  |  |  |  |
| Quality of life |  |  |  |  |  |
| AUQEI score | 55 (10) | 54 (9) | 52 (11) | .407 | 54 (10) |
| Daytime Sleepiness |  |  |  |  |  |
| PDSS score | 13 (8) | 10 (8) | 11 (8) | .098 | 11 (8) |
| **School perception** |  |  |  |  |  |
| Like school | 5 (0) | 5 (0) | 5 (0) | .580 | 5 (0) |
| Like teacher | 5 (0) | 5 (1) | 5 (0) | .093 | 5 (1) |
| Like task in the classroom | 5 (1) | 4 (1) | 5 (1) | .950 | 5 (1 |

**Note:** Values are presented as median and interquartile range for unadjusted baseline results. One-way ANOVA was used for comparisons between groups at baseline for normally distributed variables, and the Kruskal-Wallis test was used for non-normally distributed variables. Different letters indicate significant differences between groups.

CTL, control

PAL, physically active break

AB, active break

**Suplementary table 2.** Changes and post hoc results in contrasts between baseline and post-intervention.

|  | Group | ∆ | SE | 95%CI | p |
| --- | --- | --- | --- | --- | --- |
| Primary outcomes | | | | | |
| **Go/NoGo** |  |  |  |  |  |
| Time reaction  (milliseconds) | CTL | -38.2 | 42.4 | -121.5 to 45.2 | .368 |
| PAL | -104.5 | 31.3 | -166.0 to -42.9 | **.001** |
| AB | 0.1 | 35.2 | -69.1 to 69.4 | .997 |
| **DigitSpan** |  |  |  |  |  |
| Correct responses  (hits) | CTL | -0.1 | 0.3 | -0.653 to 0.427 | .682 |
| PAL | 0.6 | 0.2 | 0.273 to 0.964 | **< .001** |
| AB | -0.1 | 0.2 | -0.509 to 0.341 | .698 |
| **Cueing Posner** |  |  |  |  |  |
| Time reaction  (milliseconds) | CTL | -137.0 | 77.9 | -290.0 to 16.9 | .081 |
| PAL | -348.0 | 66.1 | -479.0 to -218.2 | **< .001** |
| AB | -122.0 | 65.5 | -251.0 to 6.8 | .063 |
| **Mental Rotation** |  |  |  |  |  |
| Time reaction  (milliseconds) | CTL | -573.0 | 433.0 | -1426.0 to 279.0 | .187 |
| PAL | -1967.0 | 335.0 | -2627.0 to -1307.0 | **< .001** |
| AB | -1478.0 | 310.0 | -2087.0 to -868.0 | **< .001** |
|  | | | | | |
| Secondary outcomes | | | | | |
| **Web-CAAFE (self-reported)** | | | | | |
| Physical activity  (frequency) | CTL | 0.2 | 0.7 | -1.112 to 1.516 | .763 |
| PAL | -0.1 | 0.2 | -0.508 to 0.314 | .644 |
| AB | -1.5 | 0.3 | -2.115 to -0.939 | **< .001** |
| **Daytime Sleepiness** |  |  |  |  |  |
| PDSS score  (0 – 32 points) | CTL | -2.2 | 1.2 | -4.618 to 0.162 | .068 |
| PAL | 2.2 | 0.8 | 0.587 to 3.714 | **.007** |
| AB | 2.3 | 1.1 | 0.103 to 4.437 | **.040** |

**Note:** The contrasts are estimated mean changes (∆), standard error (SE) with respective confidence interval (95%CI), and are based on generalized estimating equation models. p < .05, statistically significant.

CTL, control

PAL, physically active lesson

AB, active break
